# Supplementary material for: circFTO from M2 macrophage-derived small extracellular vesicles (sEV) enhances NSCLC malignancy by regulation miR-148a-3pPDK4 axis
Source: Springer Nature journal article supplement (doi:10.1007/s00262-024-03634-4), 2024-03-30
Supplement: MOESM1 [file 26925148]

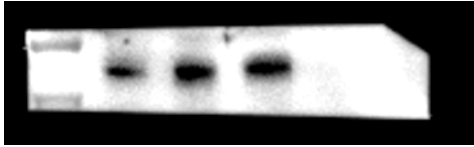

**CD206**

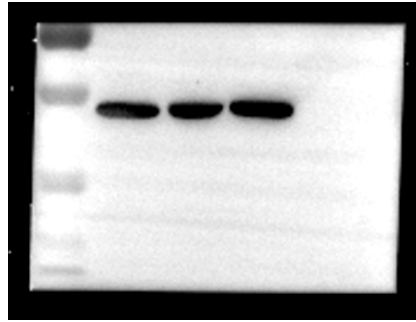

**B-tubulin**

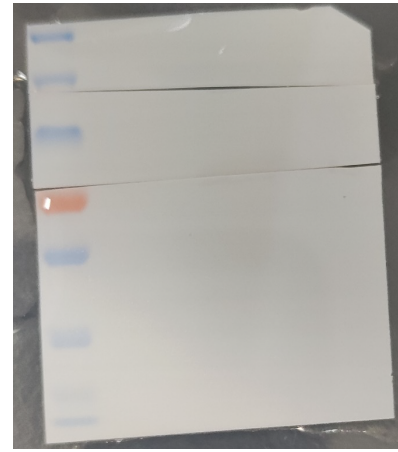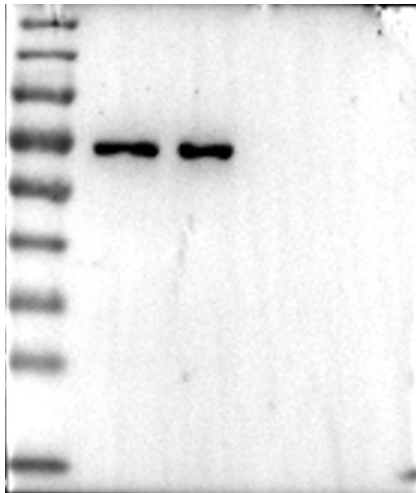

**CD63**

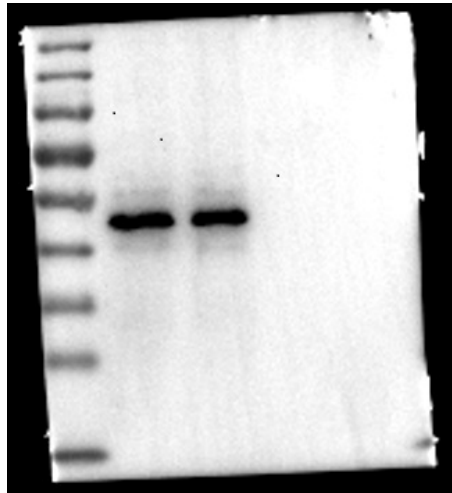

**TSG101**

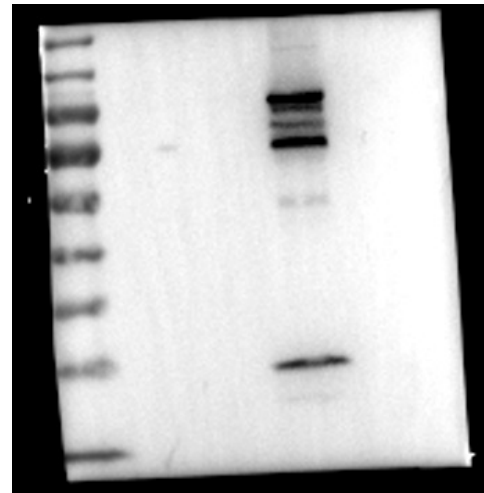

**CALNEXIN**

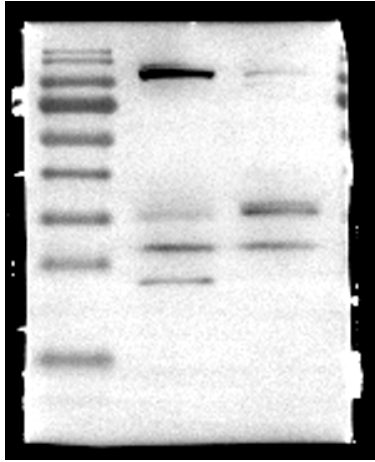

HK2

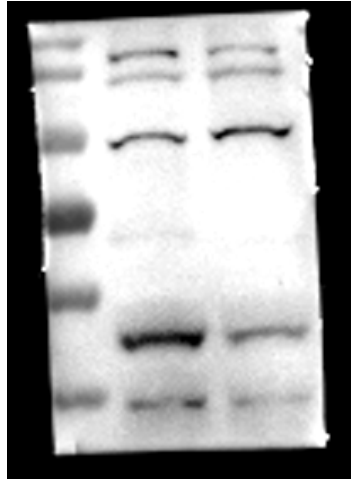

PDK4

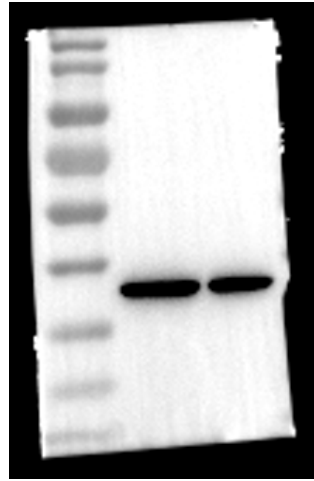

LDHA

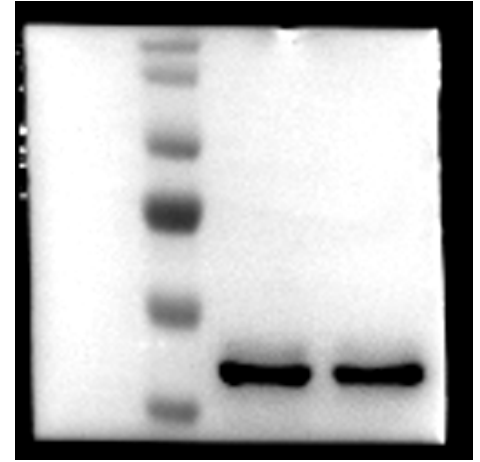

$\beta$ -actin

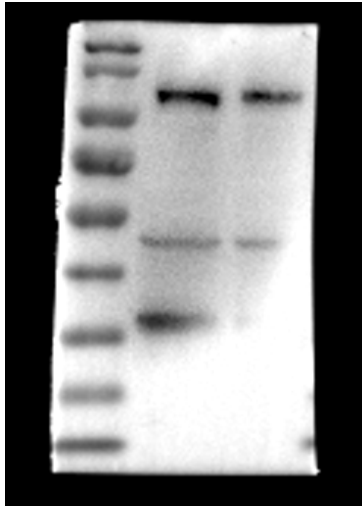

HK2

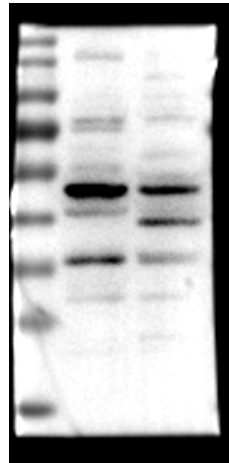

PDK4

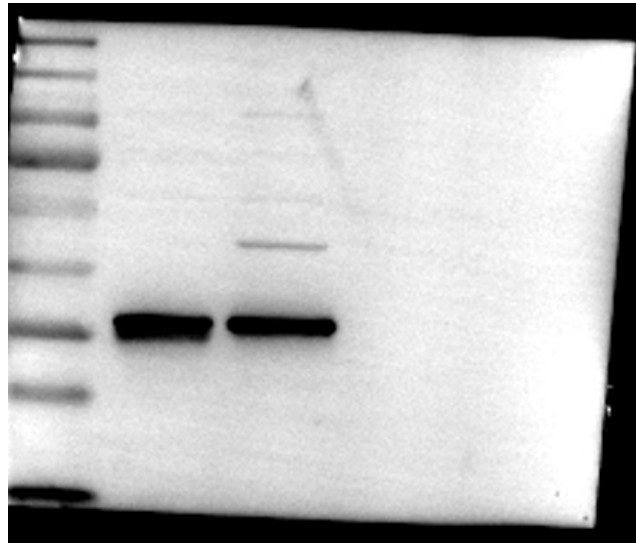

LDHA

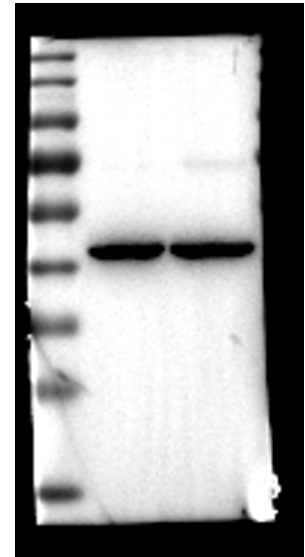

$\beta$ -actin

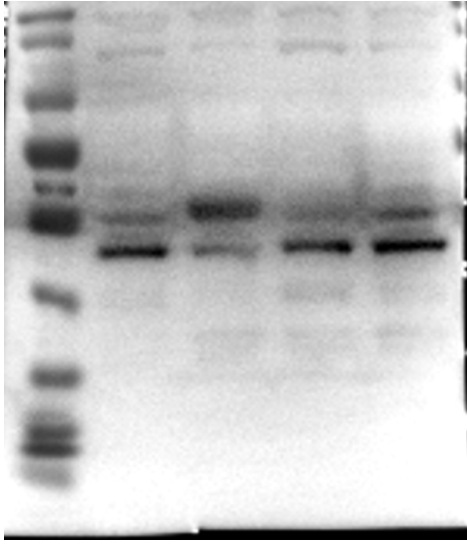

**PDK4**

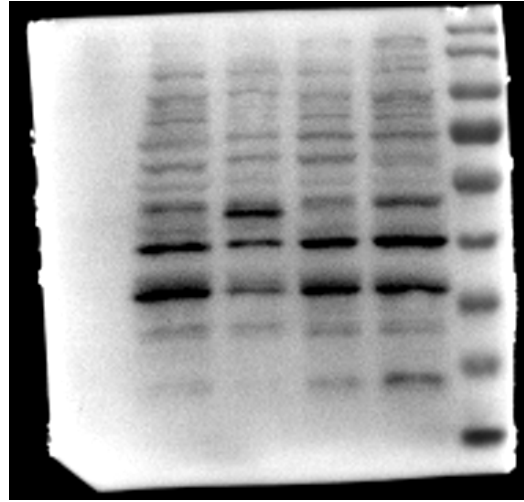

**PDK4**

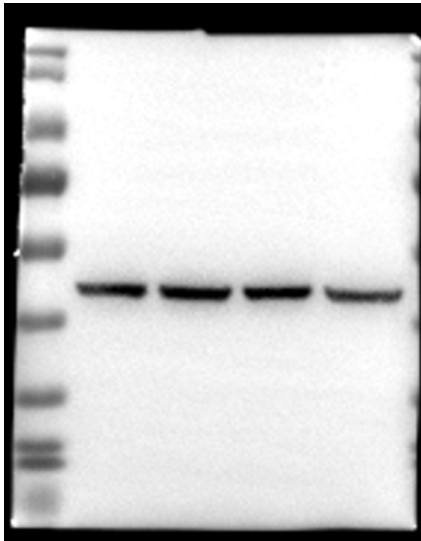

**$\beta$ -actin**

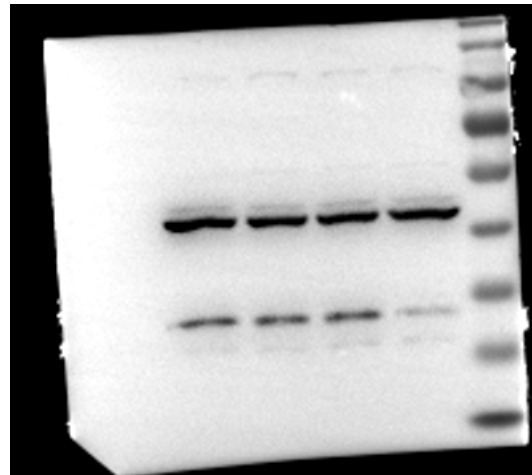

**$\beta$ -actin**

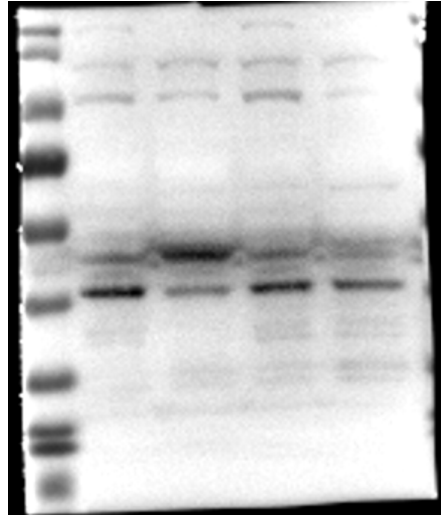

PDK4

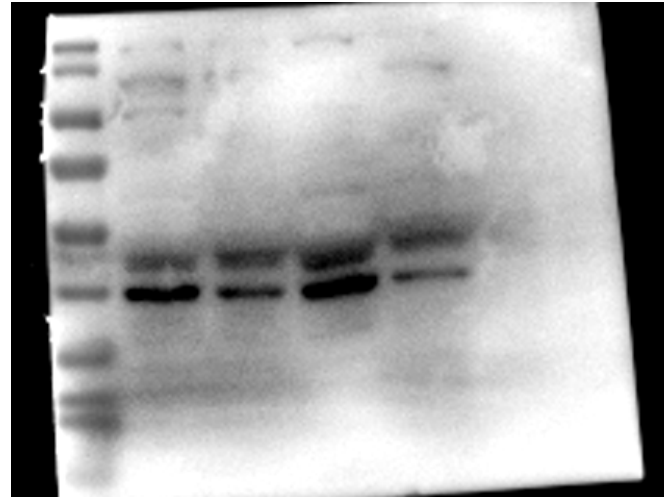

PDK4

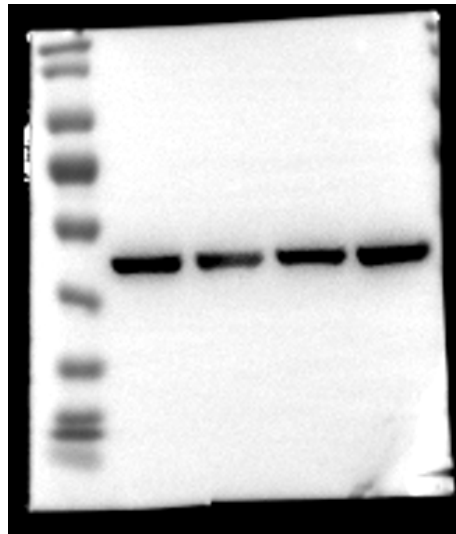

$\beta$ -actin

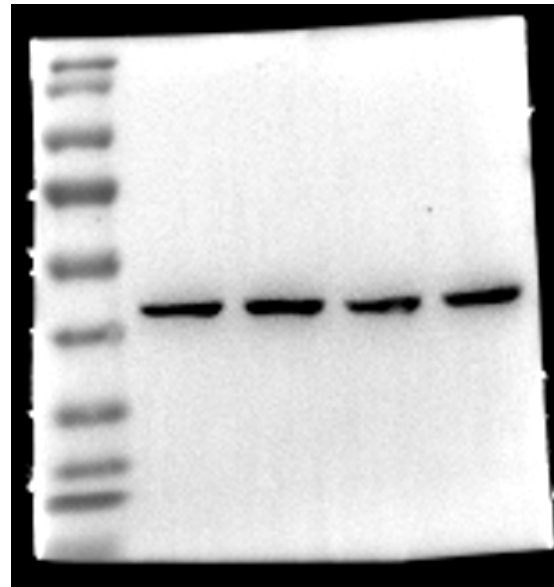

$\beta$ -actin
